# Supplementary material for: A geospatiotemporal and causal inference epidemiological exploration of substance and cannabinoid exposure as drivers of rising US pediatric cancer rates
Source: Springer Nature journal article supplement (doi:10.1186/s12885-021-07924-3), 2021-02-25

# Selected and Major Paediatric Cancer Rates Over Time 21 US Cancer Registries

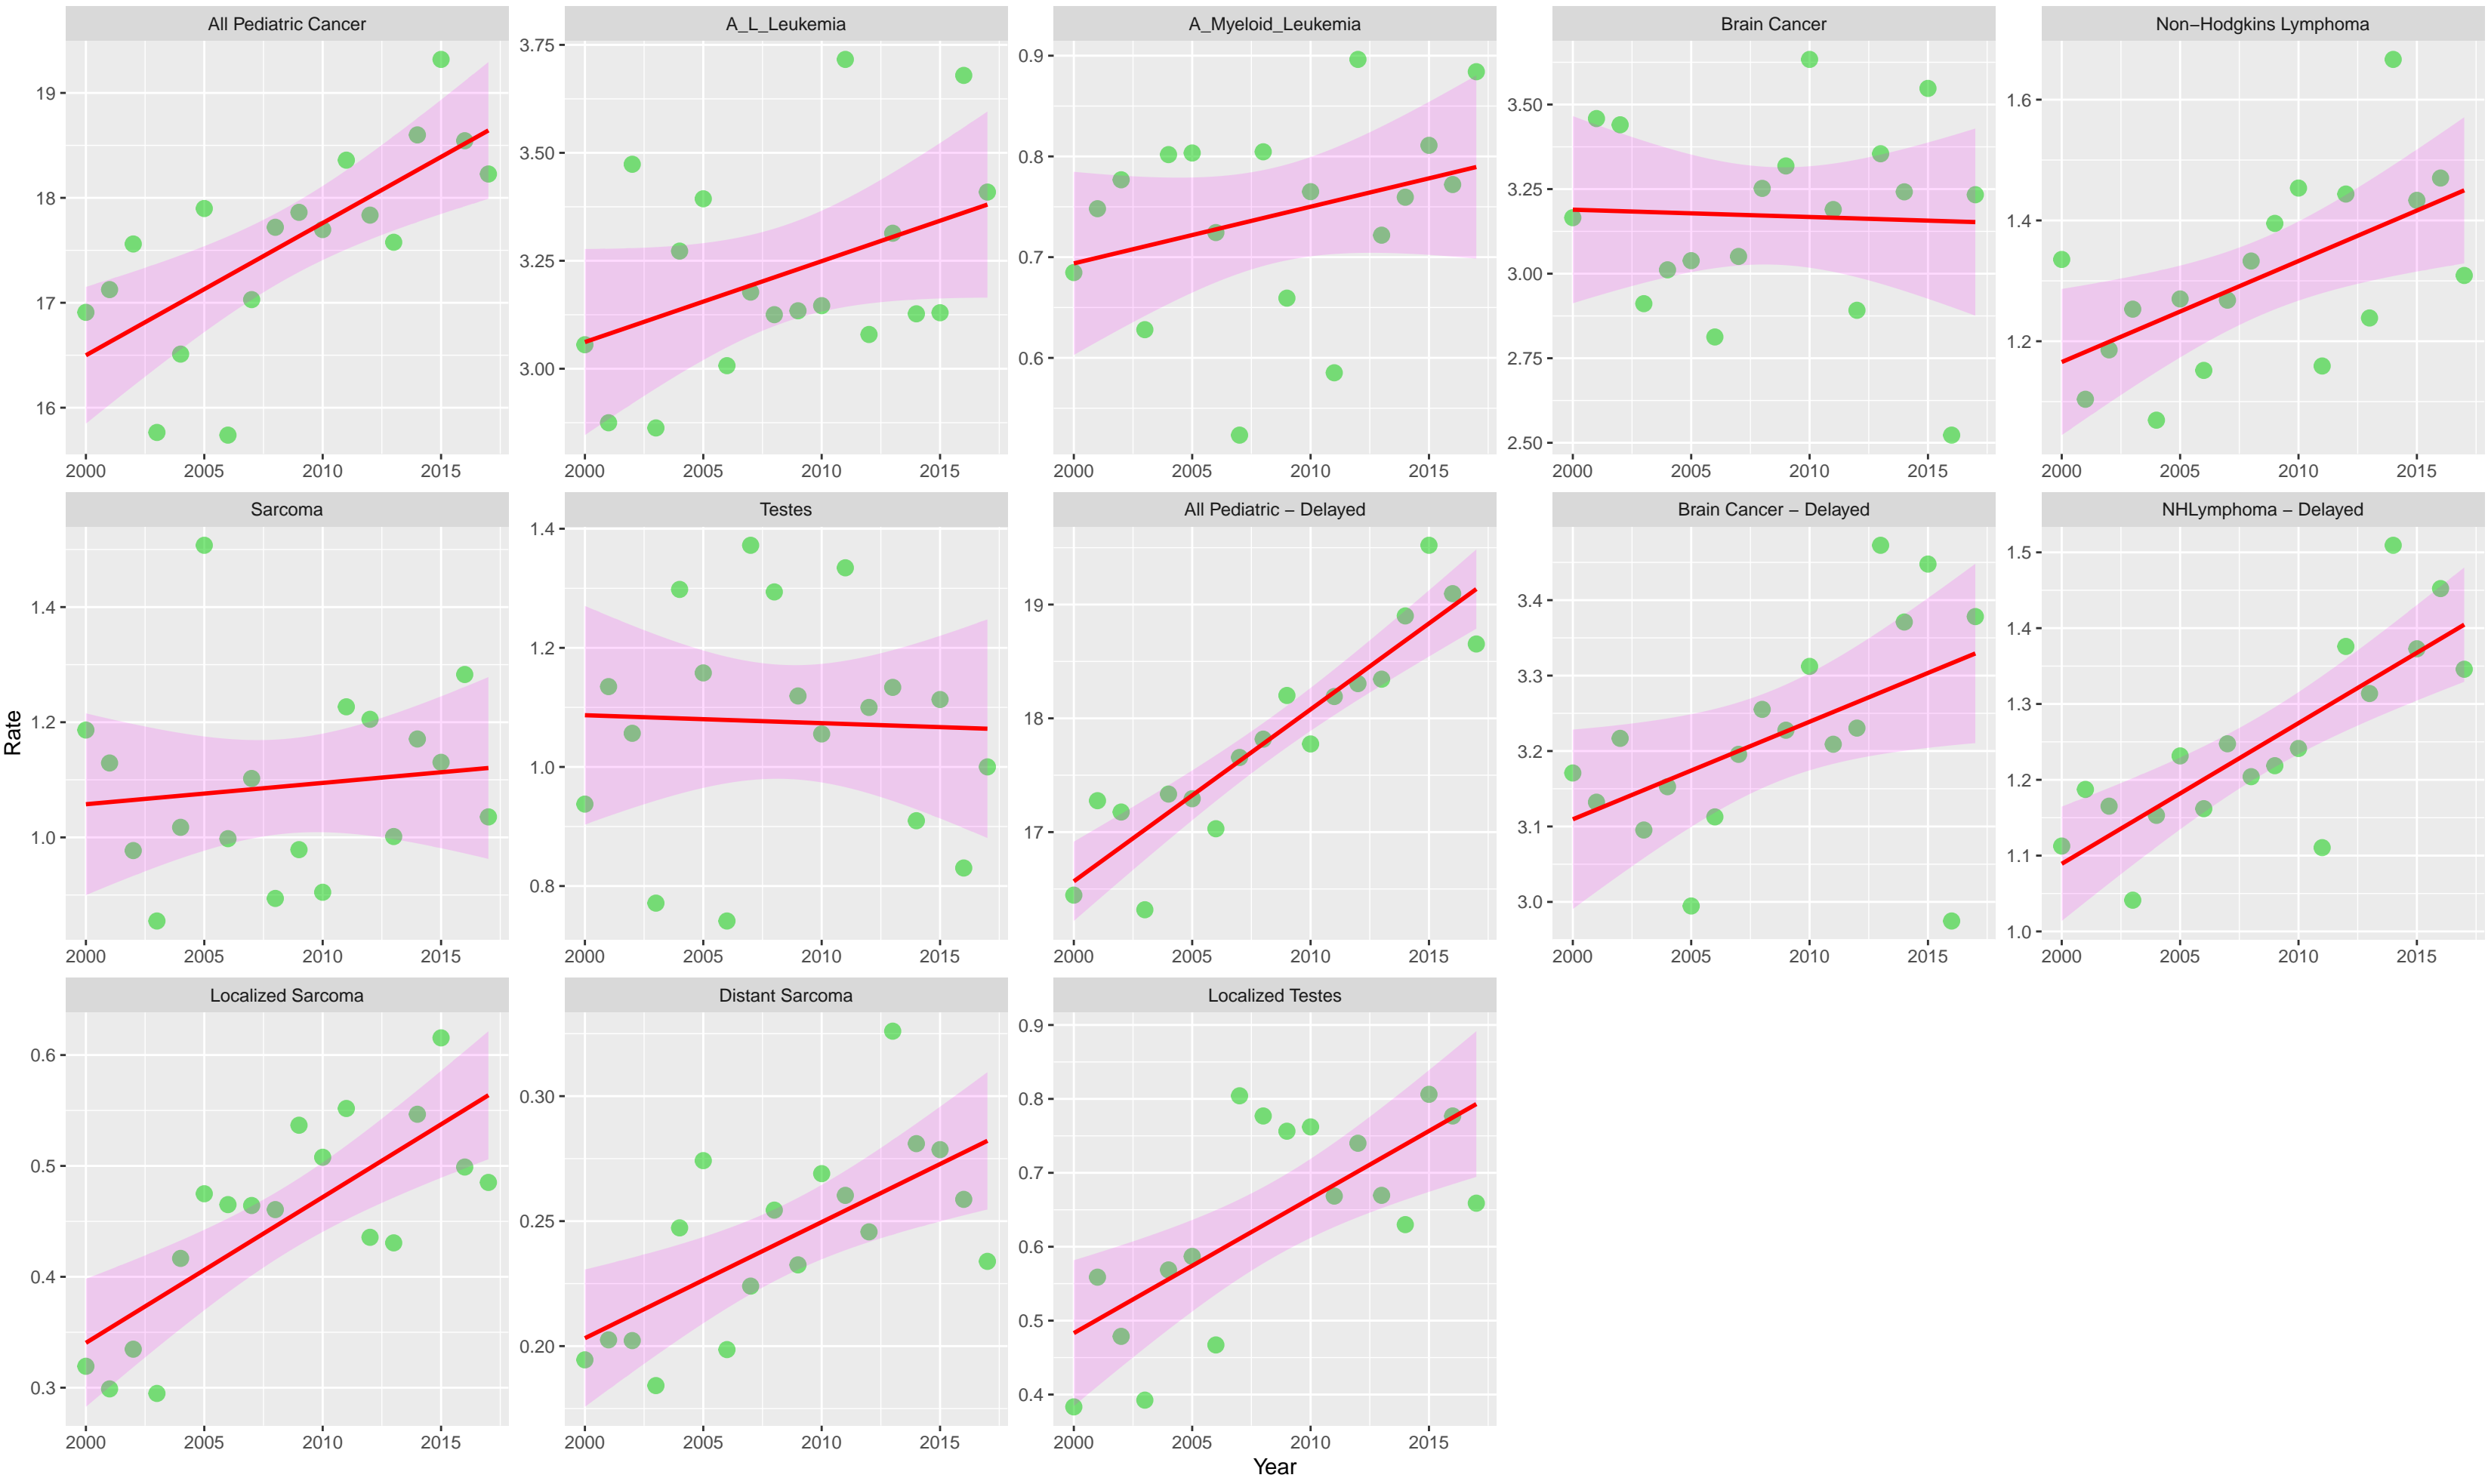

Supplement: MOESM1 [file 12885_2021_7924_MOESM1_ESM.pdf]
